# Supplementary material for: Screening the Marker Components in Psoralea corylifolia L. with the Aids of Spectrum-Effect Relationship and Component Knock-Out by UPLC-MS2
Source: PubMed Central journal article supplement (PMC6274892; doi:10.3390/ijms19113439), 2018-11-02
Supplement: ijms-19-03439-s001.pdf [file ijms-19-03439-s001.pdf]

**Screening the Marker Components in *Psoralea corylifolia* L. with the Aids of spectrum-effect relationship and Component Knock-out by UPLC-MS<sup>2</sup>**

Author names:

**Changqin Li<sup>1,2‡</sup>, Mengjun Shi<sup>1,2‡</sup>, Junya Wang<sup>1</sup>, Yong Sun<sup>1,4</sup>, Yan Zhang<sup>1,3</sup>, Wen-yi Kang<sup>1,2\*</sup>**

Author affiliations

<sup>1</sup> Joint International Research Laboratory of Food & Medicine Resource Function, Henan Province, Henan University, Kaifeng 475004, China.

<sup>2</sup> Institute of Chinese Materia Medica, Henan University, Kaifeng 475004, China.

<sup>3</sup> Hebei Food Inspection and Research Institute, Shijiazhuang 050091, China.

<sup>4</sup> Beijing Academy of Food Sciences, China Meat Research Center, Beijing 100068, China.

‡These authors contributed equally to this work.

Corresponding author details:

\*Correspondence to: Wenyi Kang, Tel: +86 10-23880680; fax: +86 10-23880680;  
Email: kangweny@hotmail.com; Postal address: Jinming Avenue, Henan University, Kaifeng 475004, China.

**Table S1** The relative retention times and characteristic peak areas of each *P. corylifolia* sample measured by HPLC (1).

| No.                 | P1      | P2      | P3       | P4       | P5       | P6       | P7      | P8      | P9      | P10      |
|---------------------|---------|---------|----------|----------|----------|----------|---------|---------|---------|----------|
| Retention Time(min) | 24.171  | 25.466  | 29.741   | 34.862   | 37.461   | 40.518   | 44.271  | 45.673  | 46.995  | 48.471   |
| S1                  | 1910171 | 1946360 | 1317112  | 898002.3 | 41593880 | 77056040 | 3010873 | 1610129 | 2210408 | 1882357  |
| S2                  | 4931025 | 7671755 | 1084838  | 2213777  | 96156350 | 50461660 | 1204003 | 5012484 | 4842989 | 722034.6 |
| S3                  | 1265623 | 1176642 | 936200.2 | 82215650 | 75796700 | 1545073  | 1573467 | 1770240 | 1107530 | 3085340  |
| S4                  | 2482634 | 2956066 | 2676640  | 87734540 | 84331340 | 5272716  | 2899254 | 3352454 | 3202544 | 5384064  |
| S5                  | 3497042 | 5263931 | 1481971  | 1.14E+08 | 1.14E+08 | 1897839  | 1806078 | 1473797 | 1774865 | 1580942  |
| S6                  | 7562726 | 4902941 | 4484689  | 98277600 | 89242290 | 3422701  | 7941749 | 8178495 | 4337410 | 3175305  |
| S7                  | 7240782 | 5687824 | 6062279  | 99660230 | 1.02E+08 | 4207686  | 3896773 | 2883527 | 3912045 | 3050735  |
| S8                  | 4924368 | 4476076 | 3130060  | 56281080 | 1.08E+08 | 2974597  | 3456537 | 4215263 | 2959213 | 4526070  |
| S9                  | 2144550 | 1999321 | 2054560  | 91964750 | 93945200 | 1945295  | 1338366 | 1704618 | 1315198 | 3806032  |
| S10                 | 2956203 | 2451960 | 2705462  | 1.14E+08 | 1.11E+08 | 1959457  | 2599175 | 2971888 | 2557256 | 6088901  |

**Table S2** The relative retention times and characteristic peak areas of each *P. corylifolia* sample measured by HPLC (2).

| No.                 | P11     | P12      | P13      | P14      | P15      | P16      | P17      | P18      | P19      | P20      |
|---------------------|---------|----------|----------|----------|----------|----------|----------|----------|----------|----------|
| Retention Time(min) | 54.265  | 59.614   | 61.75    | 63.619   | 67.106   | 69.798   | 70.977   | 72.94    | 75.433   | 77.379   |
| S1                  | 4387219 | 4924735  | 77377750 | 12354790 | 18344610 | 17456860 | 8426833  | 21531060 | 7042646  | 1027617  |
| S2                  | 936421  | 3513428  | 26386760 | 5583652  | 11352740 | 17011020 | 9334032  | 25181440 | 13037630 | 3602447  |
| S3                  | 3379895 | 68940130 | 10297280 | 13897690 | 16740930 | 9522331  | 16731780 | 4157447  | 2095937  | 29032940 |
| S4                  | 4723850 | 73570030 | 11330930 | 16897640 | 19127470 | 9443427  | 26192500 | 8199690  | 1665061  | 30760460 |
| S5                  | 4645381 | 5330264  | 78613030 | 9607765  | 15331270 | 23923060 | 13710360 | 45444070 | 12818310 | 8410219  |
| S6                  | 6946191 | 92636930 | 12434790 | 25530230 | 27100100 | 15797370 | 76998250 | 43766980 | 13756720 | 52134870 |
| S7                  | 5488332 | 6096722  | 40803080 | 14003520 | 15760150 | 24265490 | 13993270 | 59800820 | 17367990 | 8396749  |
| S8                  | 5308022 | 91049840 | 14932430 | 19488140 | 21013750 | 11978830 | 38433860 | 15863440 | 3033119  | 42666760 |
| S9                  | 3364813 | 73475760 | 10857930 | 12628730 | 16629700 | 7957881  | 21102260 | 4413539  | 999205.4 | 35904300 |
| S10                 | 5822505 | 90111810 | 15325430 | 26493170 | 23823150 | 14181130 | 25071530 | 8060044  | 2367130  | 36874970 |

**Table S3** The relative retention times and characteristic peak areas of each *P. corylifolia* sample measured by HPLC (3).

| No.                 | P21      | P22      | P23      | P24      | P25      | P26      | P27      | P28      | P29      | P30      |
|---------------------|----------|----------|----------|----------|----------|----------|----------|----------|----------|----------|
| Retention Time(min) | 80.354   | 84.743   | 88.176   | 91.43    | 95.749   | 98.433   | 99.824   | 102.073  | 106.201  | 108.495  |
| S1                  | 39070780 | 5936956  | 30717810 | 38252920 | 57609060 | 981166.8 | 57905280 | 1513077  | 3630110  | 1.05E+08 |
| S2                  | 7619369  | 1419304  | 10195570 | 6637759  | 16217200 | 1530603  | 23686470 | 438831.2 | 6195911  | 1.01E+08 |
| S3                  | 5112052  | 26418060 | 32185780 | 40499470 | 718601.8 | 24147030 | 3711368  | 1836312  | 35578350 | 87453720 |
| S4                  | 4357970  | 26483470 | 41617810 | 42317820 | 1221740  | 44067000 | 5952085  | 5885711  | 23675130 | 77847980 |
| S5                  | 44358340 | 6092755  | 22784000 | 46971360 | 62331360 | 1429803  | 43562710 | 7145450  | 12648380 | 9249037  |
| S6                  | 5926343  | 36882860 | 63438640 | 64272810 | 7381568  | 18679850 | 13590430 | 27690930 | 29660510 | 37184440 |
| S7                  | 35746020 | 5283760  | 29112520 | 47512900 | 66811130 | 5407201  | 47580130 | 11063190 | 21141930 | 22841850 |
| S8                  | 4700841  | 34157470 | 53081660 | 69312900 | 4253129  | 45309500 | 9527512  | 11786770 | 32708020 | 4390750  |
| S9                  | 2235243  | 23381550 | 38657060 | 44370440 | 2769637  | 53421100 | 2400802  | 3307228  | 36158160 | 14378870 |
| S10                 | 1997108  | 52999830 | 55009220 | 53508280 | 1888468  | 43842490 | 7982105  | 2259706  | 12192640 | 9453751  |

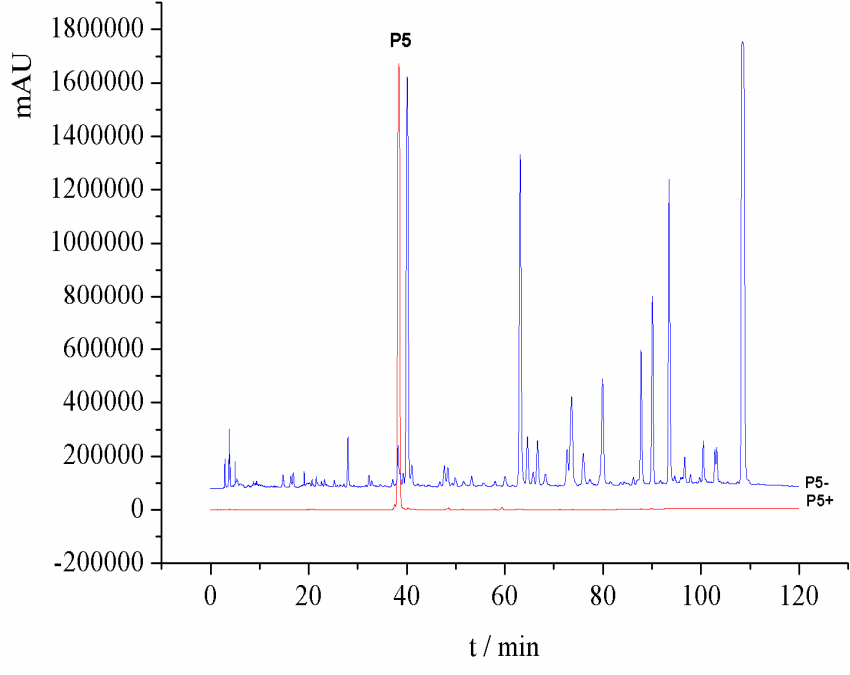

(c)

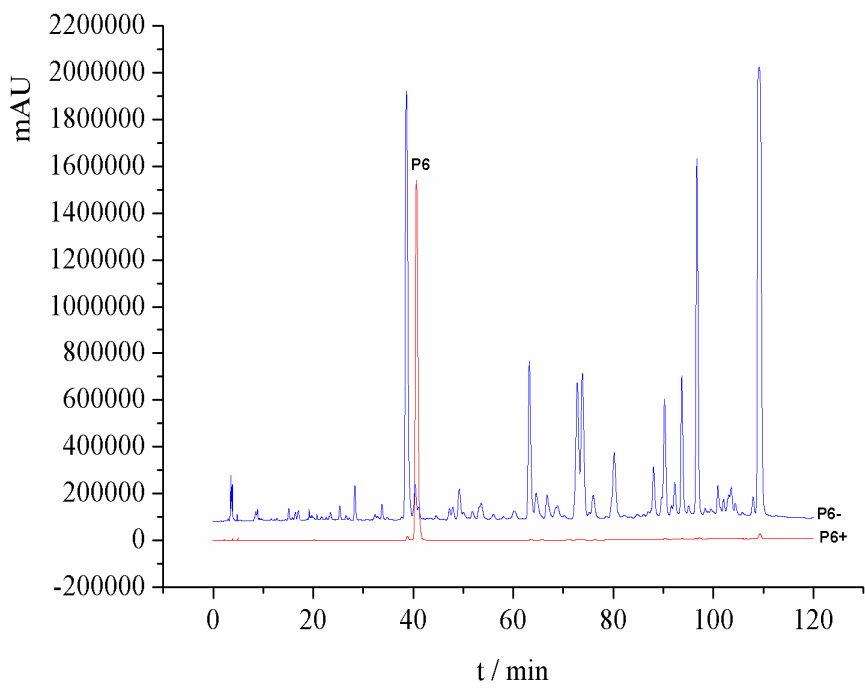

(d)

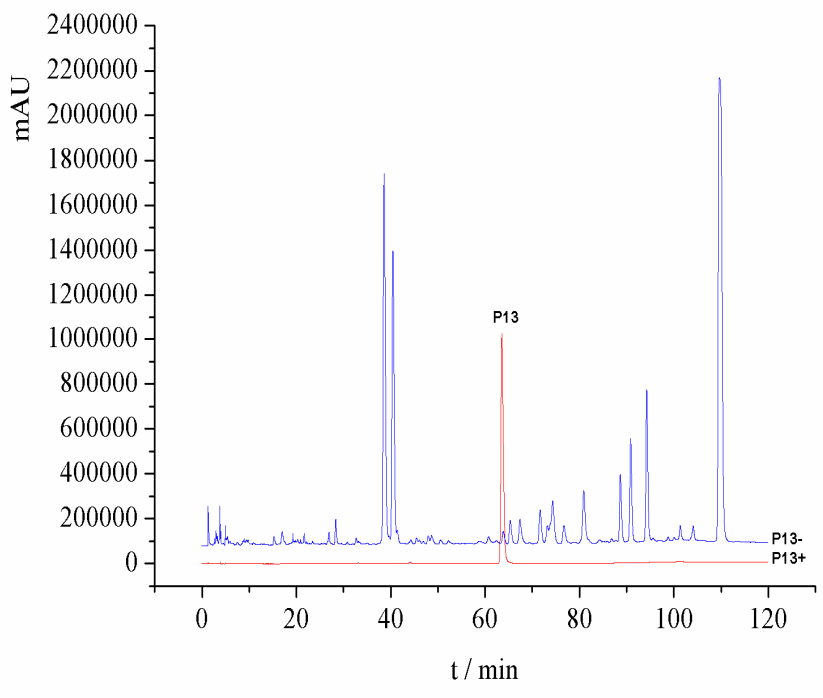

(e)

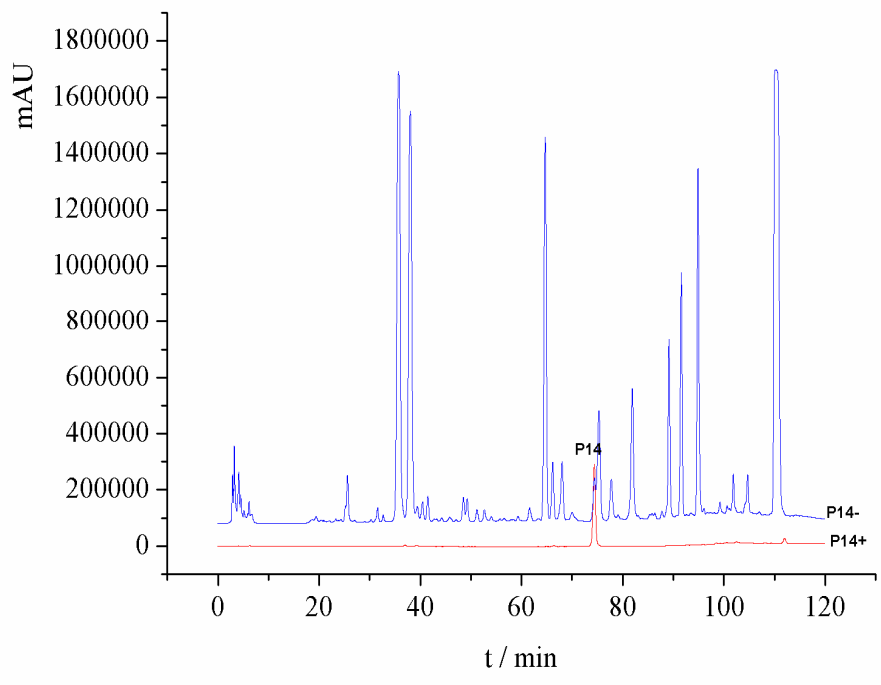

(f)

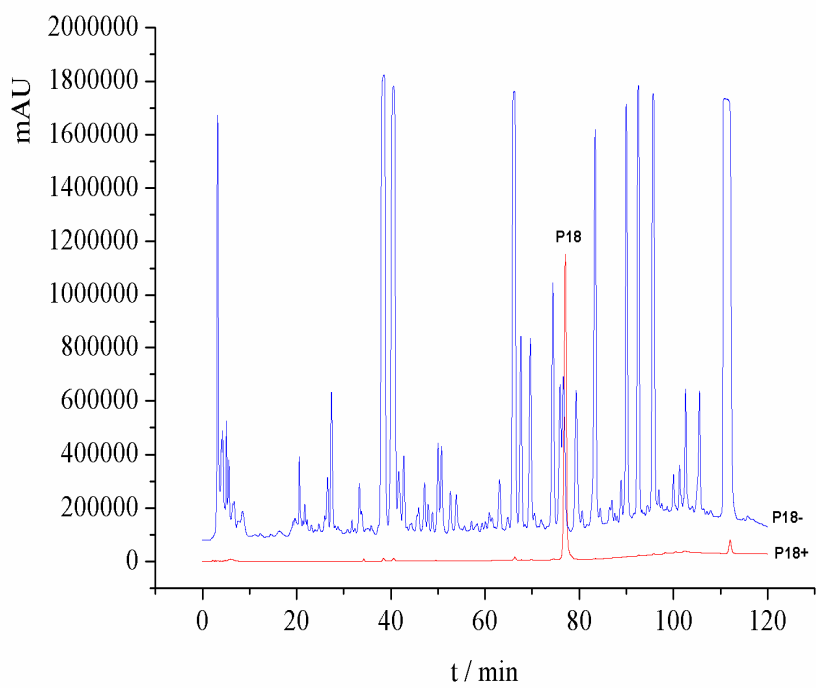

(g)

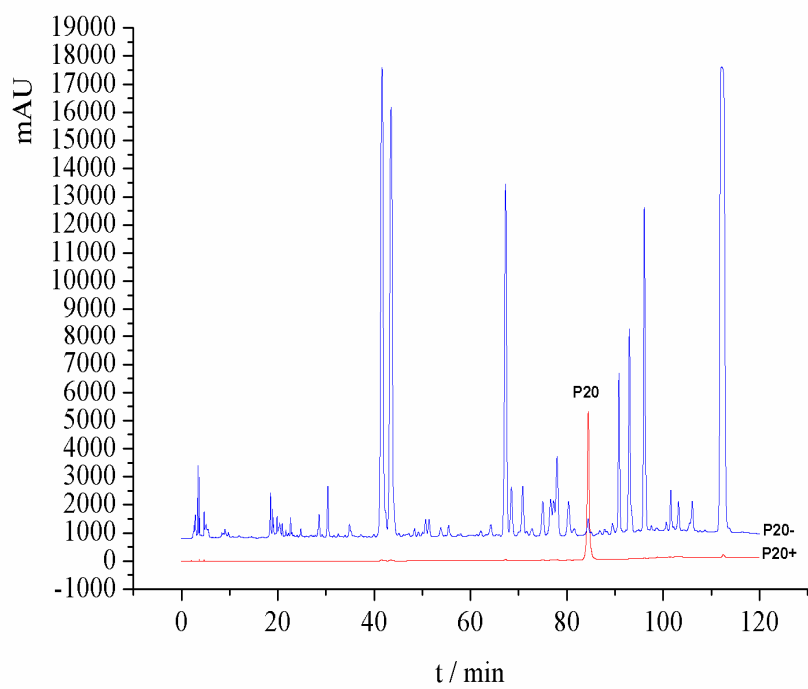

(h)

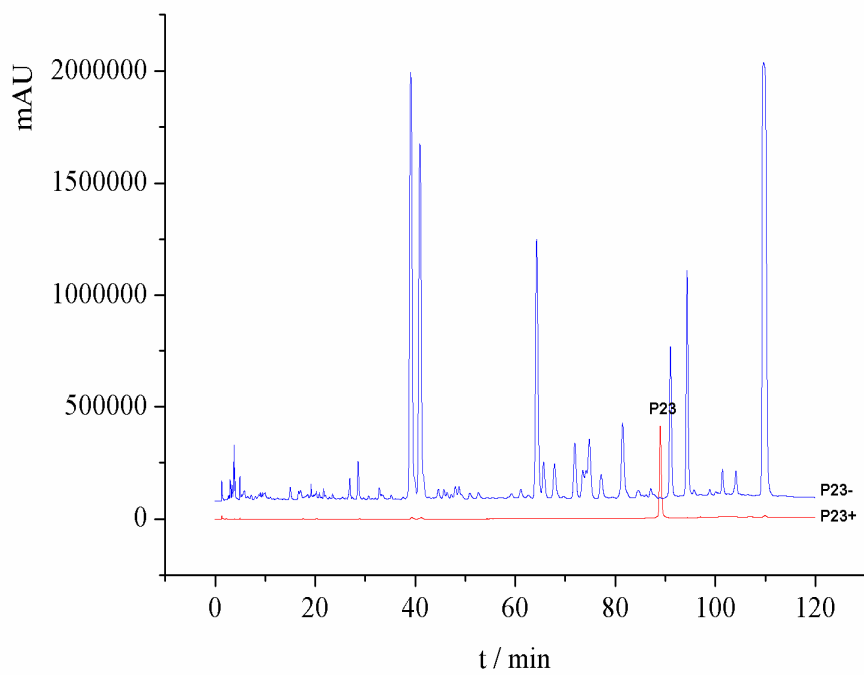

(i)

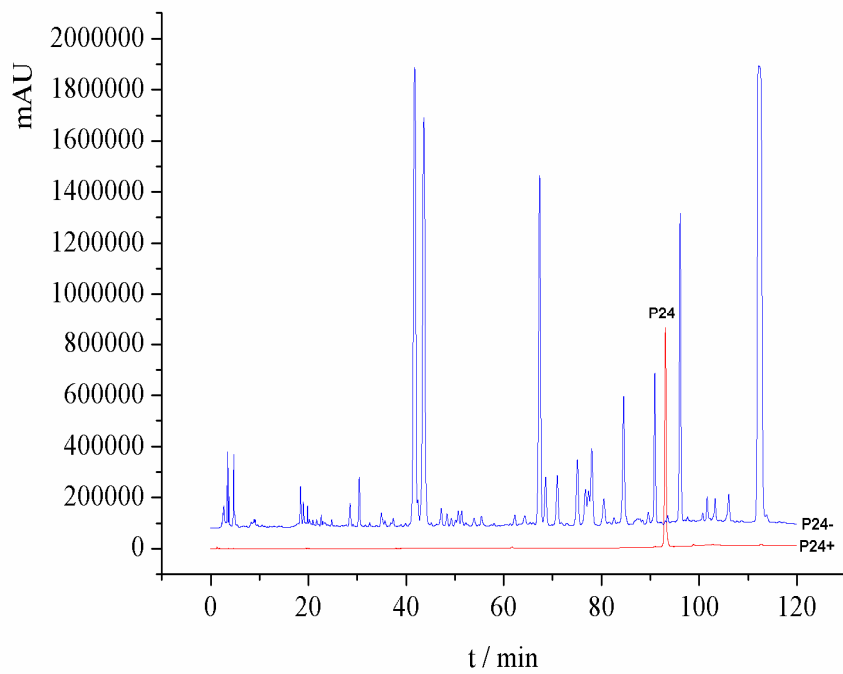

(j)



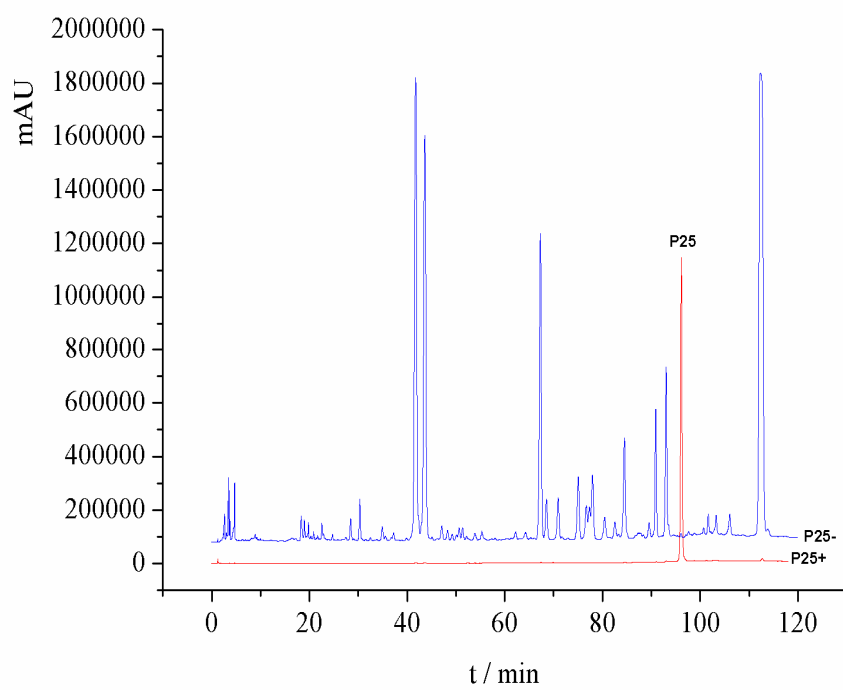

**(k)**

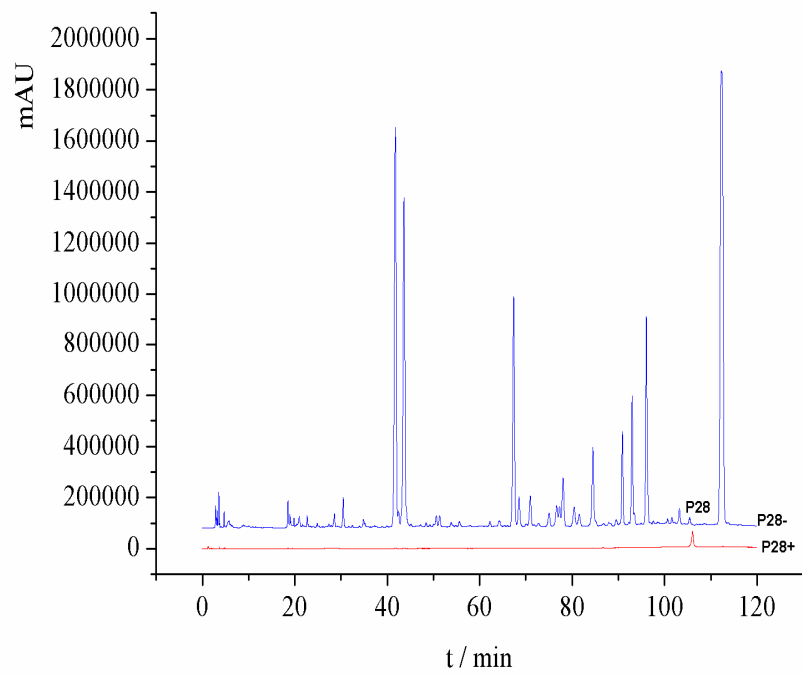

**(l)**

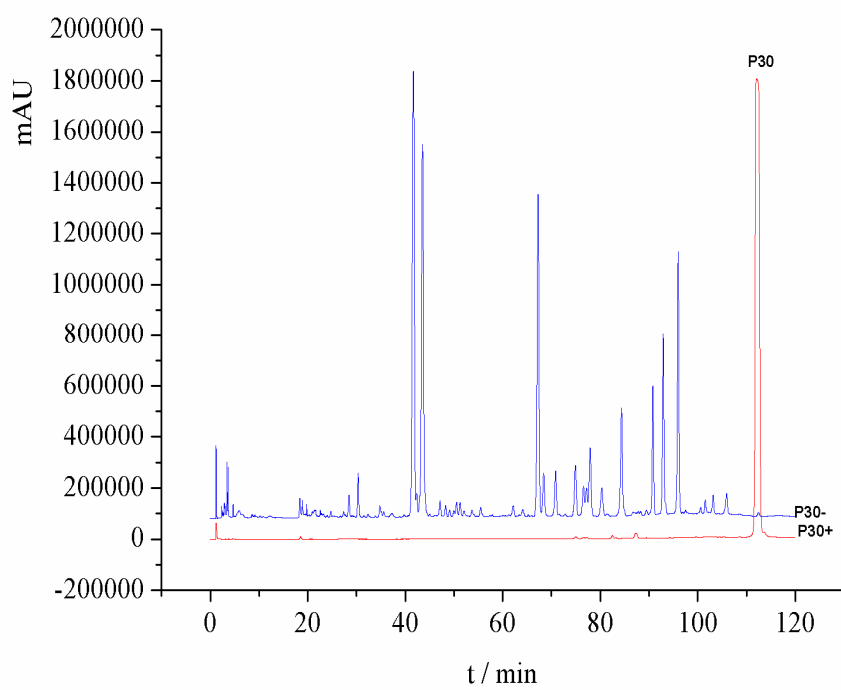

(m)

Figure S1 (c-m) A component ( $P_{X+}$ ) and negative samples ( $P_{X-}$ )
